# Supplementary material for: Gliosarcoma: a clinical and radiological analysis of 48 cases
Source: Springer Nature journal article supplement (doi:10.1007/s00330-018-5398-y), 2018-06-12
Supplement: MOESM2 [file 15839178]

| **Supplemental Table 1：The clinicopathological data of 48 GSM cases.** | | | | | | | | | | |  |  |  |  |  |  |  |  |  |  |
| --- | --- | --- | --- | --- | --- | --- | --- | --- | --- | --- | --- | --- | --- | --- | --- | --- | --- | --- | --- | --- |
| Case (No.) | Gender | A(Y) | Location | Headache | Vomit | Nausea | Numbness | Visual defect | Unstable Gait | KPS | Extent of Resection | Radiotherapy | Chemotherapy | OS | state | IDH1 | MGMT | P53 | GFAP | Ki-67 (%) |
| 1 | F | 52 | left, Frontal-Parietal lobe | N | N | N | Y | N | N | 80 | Gross Total Resection | N | N | 3 | dead | - | - | + | 0.5 | 30 |
| 2 | F | 67 | left, Temporal-Parietal lobe | N | N | N | N | N | N | 90 | Gross Total Resection | Y | Y | N/A | censored | - | - | - | 0.45 | 30 |
| 3 | F | 62 | left,Frontal lobe | Y | N | N | N | N | N | 80 | Extended Resection | N | N | 8 | alive | N/A | N/A | + | NA | 50 |
| 4 | F | 67 | left, Temporal Lobe | N | N | N | N | N | N | 80 | Extended Resection | N | Y | 25 | dead | - | + | + | 0.95 | 20 |
| 5 | F | 60 | left, Ventricle | Y | Y | N | N | N | N | 70 | Gross Total Resection | N | N | N/A | censored | N/A | N/A | N/A | 0.7 | 35 |
| 6 | M | 30 | left, Brain stem-Epicele-Cerebellum | Y | Y | N | N | N | Y | 80 | Gross Total Resection | N | Y | 11 | alive | - | - | N/A | 0.3 | 30 |
| 7 | M | 64 | right, Frontal-Temporal lobe | Y | N | N | N | N | N | 80 | Gross Total Resection | N | N | 3 | dead | - | - | + | 0.15 | 70 |
| 8 | M | 79 | right, Temporal Lobe | Y | N | N | N | N | N | 80 | Gross Total Resection | N | N | N/A | censored | N/A | N/A | N/A | 0.05 | 45 |
| 9 | F | 45 | right, Temporal-Parietal lobe | N | N | N | N | N | N | 90 | Gross Total Resection | N | N | 7 | alive | - | N/A | N/A | 0.05 | 50 |
| 10 | M | 47 | left, cerebellum | N | N | N | N | N | Y | 80 | Subtotal Resection | N | N | 23 | alive | - | - | N/A |  | 10 |
| 11 | M | 48 | left, Frontal lobe | Y | N | N | N | N | N | 70 | Gross Total Resection | N | N | 6 | dead | N/A | N/A | N/A | 0.85 | 80 |
| 12 | F | 54 | right, Temporal Lobe | N | N | N | N | N | N | 90 | Gross Total Resection | N | N | 11 | alive | N/A | - | ++ | NA | 50 |
| 13 | F | 80 | left, Parietal-Occipital-Temporal lobe | N | N | N | Y | N | N | 70 | Gross Total Resection | N | N | 8 | dead | N/A | N/A | + | NA | 30 |
| 14 | F | 70 | right, Temporal Lobe | Y | Y | N | N | N | N | 70 | Gross Total Resection | N | N | 10 | dead | N/A | N/A | ++ | 1 | 35 |
| 15 | M | 42 | left, Frontal-Temporal lobe | N | N | N | N | N | N | 70 | Gross Total Resection | N | N | 10 | dead | - | - | + | 0.25 | 20 |
| 16 | M | 31 | right, Temporal Lobe-Basal ganglia region | Y | N | N | N | N | N | 80 | Gross Total Resection | N | N | 8 | dead | - | - | ++ | NA | 70 |
| 17 | F | 27 | left, Lateral ventricle | Y | N | N | N | N | N | 80 | Gross Total Resection | Y | Y | 9 | alive | +++ | + | - | 0.3 | 70 |
| 18 | M | 42 | left, Frontal-Temporal-Parietal+Corpus callosum | Y | N | N | N | Y | N | 70 | Subtotal Resection | N | N | N/A | censored | + | N/A | - | NA | 75 |
| 19 | F | 24 | right, Temporal-Parietal lobe | Y | Y | N | N | N | N | 80 | Gross Total Resection | N | N | 9 | dead | + | N/A | - | 0.35 | 70 |
| 20 | M | 48 | right,Frontal lobe | Y | Y | Y | N | N | N | 80 | Extended Resection | N | N | 8 | alive | + | + | - | 0.95 | 15 |
| 21 | M | 47 | left, Temporal lobe | Y | N | N | N | N | N | 90 | Extended Resection | N | Y | 12 | dead | + | + | - | 0.7 | 60 |
| 22 | F | 77 | right, Occipital lobe | Y | Y | N | N | N | N | 70 | Extended Resection | Y | Y | 7 | dead | - | + | + | 0.6 | 15 |
| 23 | F | 53 | right, Frontal lobe | N | Y | Y | N | N | N | 90 | Gross Total Resection | N | Y | 24 | dead | - | + | + | + | 30 |
| 24 | M | 67 | left, Lateral ventricle | Y | N | N | N | N | N | 90 | Subtotal Resection | N | N | 10 | dead | N/A | N/A | N/A | 0.8 | 50 |
| 25 | M | 66 | right, Temporal-Parietal lobe | Y | N | N | N | N | N | 80 | Gross Total Resection | N | Y | 46 | dead | + | - | + | + | 10 |
| 26 | M | 46 | left, Lateral ventricle | Y | N | N | N | N | N | 80 | Gross Total Resection | N | N | 10 | dead | - | + | N/A | 0.25 | 20 |
| 27 | M | 43 | left, Temporal-Parietal lobe | N | N | N | N | N | N | 80 | Gross Total Resection | Y | N | 16 | dead | - | N/A | + | 0.15 | 40 |
| 28 | M | 4 | right, Temporal-Frontal lobe | Y | N | N | N | N | N | 80 | Gross Total Resection | N | N | 7 | dead | N/A | + | + | NA | 70 |
| 29 | M | 23 | right, Basal ganglia region-Temporal lobe | N | N | N | Y | Y | Y | 80 | Gross Total Resection | Y | Y | 19 | dead | N/A | - | + | NA | 10 |
| 30 | F | 46 | left, Frontal lobe | Y | Y | N | N | N | N | 70 | Extended Resection | N | N | 8 | alive | - | N/A | ++ | NA | 20 |
| 31 | M | 60 | right, Frontal lobe | Y | N | N | N | N | N | 70 | Extended Resection | N | Y | 10 | dead | N/A | - | - | NA | 30 |
| 32 | M | 48 | right, Temporal lobe | Y | Y | N | N | N | N | 80 | Gross Total Resection | Y | N | 18 | dead | - | N/A | - | NA | 40 |
| 33 | M | 61 | right, Frontal-Parietal lobe | N | N | N | Y | N | N | 80 | Gross Total Resection | N | N | 9 | dead | N/A | - | + | NA | 50 |
| 34 | M | 50 | left, Temporal-Parietal lobe | Y | N | N | N | N | N | 80 | Subtotal Resection | N | N | 12 | censored | - | + | + | NA | 30 |
| 35 | F | 49 | left, Temporal-Parietal lobe | N | N | N | Y | N | N | 80 | Gross Total Resection | Y | Y | 35 | dead | - | - | + | NA | 20 |
| 36 | M | 63 | left, Temporal-Parietal lobe | N | N | N | Y | N | N | 80 | Gross Total Resection | Y | N | 11 | alive | N/A | - | N/A | NA | 30 |
| 37 | F | 48 | Temporal Lobe | Y | Y | N | N | N | N | 90 | Gross Total Resection | Y | Y | 19 | dead | - | N/A | + | NA | 40 |
| 38 | M | 52 | Temporal Lobe | N | Y | N | N | N | N | 80 | Gross Total Resection | N | N | 9 | dead | - | + | + | NA | 60 |
| 39 | F | 37 | Frontal lobe | Y | N | N | Y | N | N | 80 | Gross Total Resection | Y | Y | 9 | alive | - | N/A | + | NA | 50 |
| 40 | M | 52 | Temporal Lobe | Y | N | N | Y | N | N | 80 | Gross Total Resection | Y | N | 16 | dead | N/A | + | - | NA | 20 |
| 41 | F | 38 | Parietal lobe | N | N | N | N | N | N | 70 | Gross Total Resection | Y | N | 15 | alive | - | N/A | N/A | NA | 10 |
| 42 | M | 35 | Temporal-Occipital lobe | Y | N | N | Y | N | N | 80 | Gross Total Resection | N | N | 8 | dead | N/A | - | + | NA | 50 |
| 43 | M | 57 | Temporal Lobe | N | N | Y | N | N | N | 90 | Gross Total Resection | Y | Y | 19 | dead | - | N/A | + | NA | 10 |
| 44 | M | 51 | Temporal Lobe | Y | N | N | N | N | N | 80 | Gross Total Resection | N | N | 9 | dead | - | - | - | NA | 50 |
| 45 | F | 52 | Lateral ventricle | Y | Y | N | N | N | N | 80 | Gross Total Resection | Y | Y | 12 | alive | - | - | + | NA | 10 |
| 46 | M | 57 | Frontal lobe | Y | N | Y | N | N | N | 80 | Gross Total Resection | Y | N | 8 | alive | N/A | - | N/A | NA | 70 |
| 47 | F | 66 | Temporal Lobe | Y | N | N | N | N | Y | 90 | Gross Total Resection | N | N | 11 | alive | - | - | + | NA | 30 |
| 48 | M | 65 | Temporal Lobe | Y | Y | N | N | N | N | 80 | Gross Total Resection | Y | Y | 5 | dead | - | N/A | N/A | NA | 70 |
